# Supplementary material for: Modeling and Prediction of Ride-Sharing Utilization Dynamics
Source: Hindawi journal article supplement (doi:10.1155/2019/6125798), 2019-11-28
Supplement: f1 [file 6125798.f1.pdf]

# Appendix A: Prediction Results

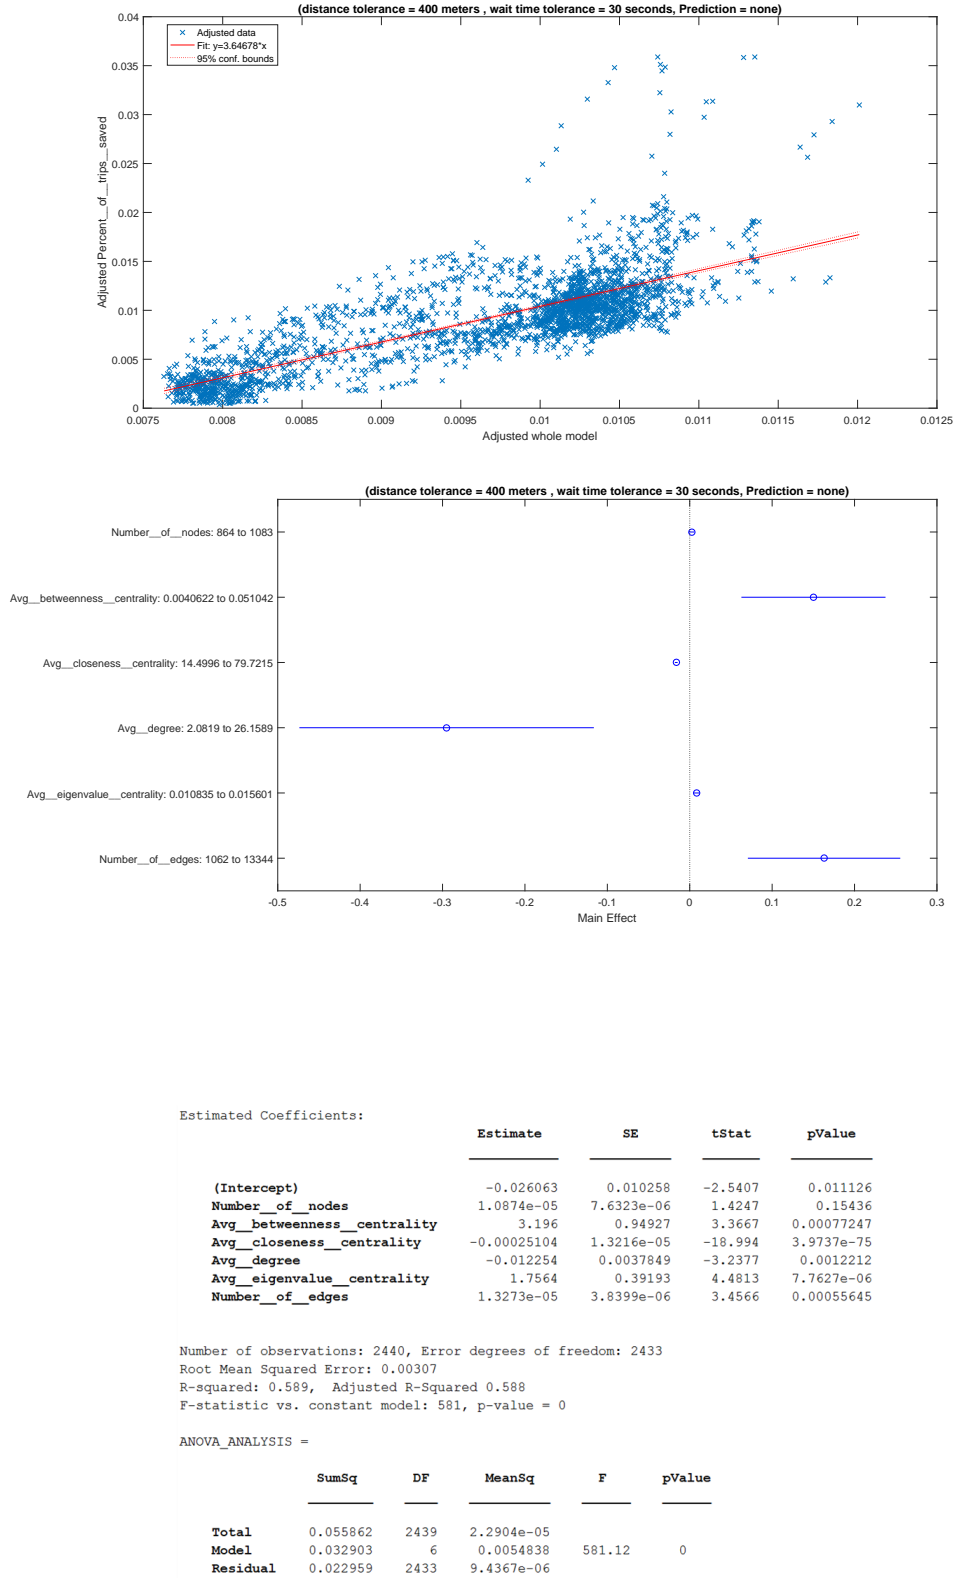

**Fig. 17.** Multilinear regression model, predicting the ride-sharing utilization using the dynamic network's properties

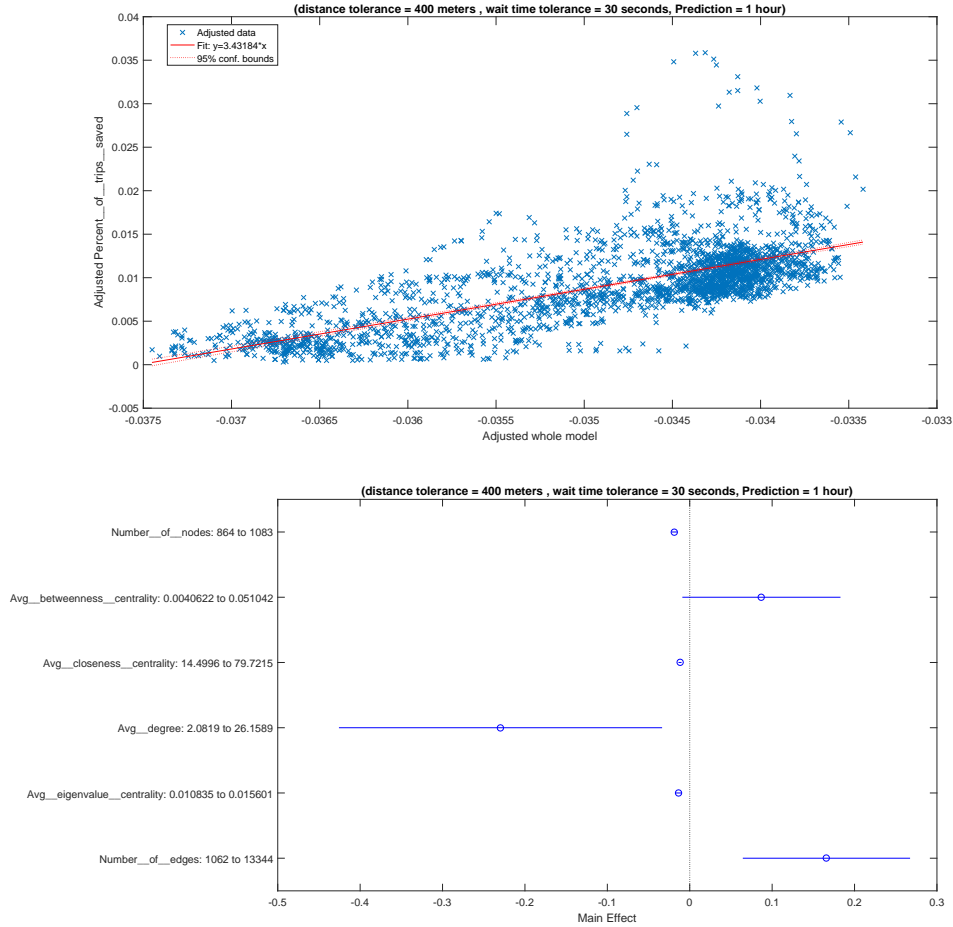

Estimated Coefficients:

|                            | Estimate    | SE         | tStat   | pValue     |
|----------------------------|-------------|------------|---------|------------|
| (Intercept)                | 0.12878     | 0.011271   | 11.426  | 1.7369e-29 |
| Number_of_nodes            | -8.5893e-05 | 8.3765e-06 | -10.254 | 3.4997e-24 |
| Avg_betweenness_centrality | 1.8516      | 1.0415     | 1.7777  | 0.075571   |
| Avg_closeness_centrality   | -0.00018101 | 1.4562e-05 | -12.431 | 1.9343e-34 |
| Avg_degree                 | -0.0095375  | 0.0041534  | -2.2963 | 0.021741   |
| Avg_eigenvalue_centrality  | -2.8895     | 0.43166    | -6.6939 | 2.6888e-11 |
| Number_of_edges            | 1.3508e-05  | 4.2145e-06 | 3.2052  | 0.0013673  |

Number of observations: 2437, Error degrees of freedom: 2430  
Root Mean Squared Error: 0.00337  
R-squared: 0.493, Adjusted R-Squared 0.492  
F-statistic vs. constant model: 394, p-value = 0

ANOVA\_ANALYSIS =

|          | SumSq    | DF   | MeanSq     | F      | pValue |
|----------|----------|------|------------|--------|--------|
| Total    | 0.054512 | 2436 | 2.2378e-05 |        |        |
| Model    | 0.026891 | 6    | 0.0044818  | 394.29 | 0      |
| Residual | 0.027621 | 2430 | 1.1367e-05 |        |        |

**Fig. 18.** Multilinear regression model, predicting the ride-sharing utilization using the dynamic network's properties 2.

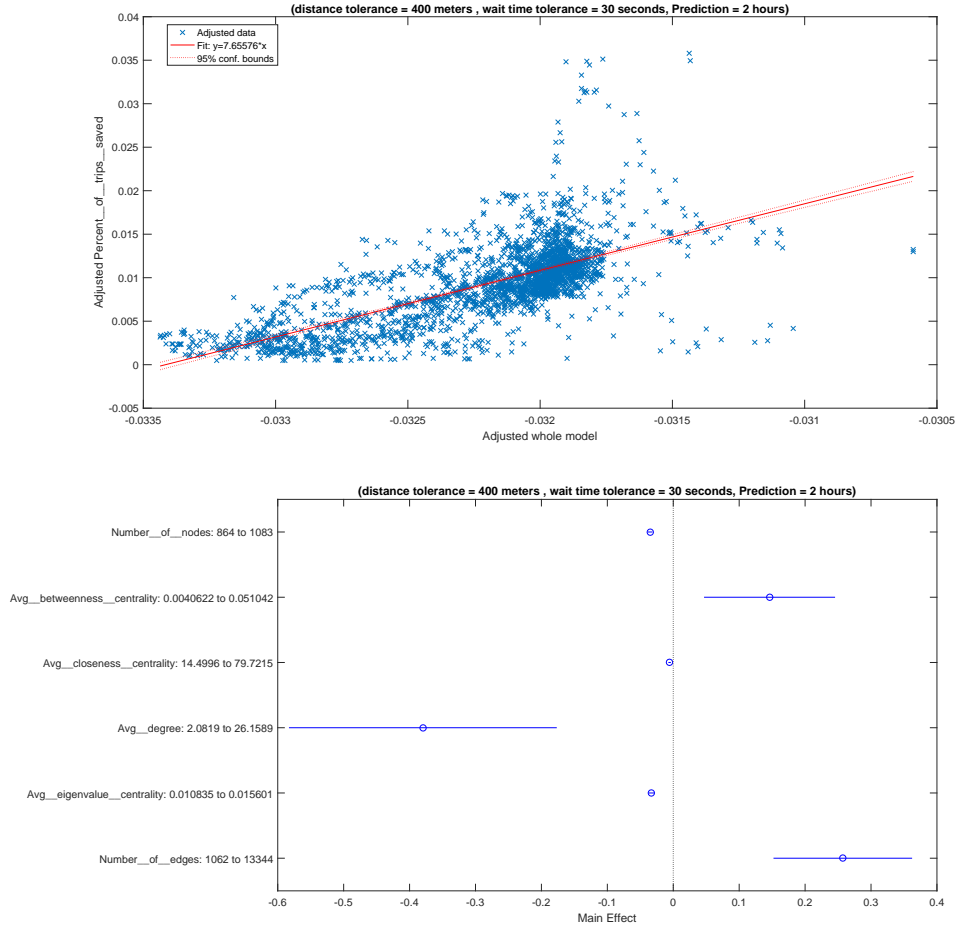

Estimated Coefficients:

|                            | Estimate    | SE         | tStat   | pValue     |
|----------------------------|-------------|------------|---------|------------|
| (Intercept)                | 0.25583     | 0.011669   | 21.924  | 2.3641e-97 |
| Number_of_nodes            | -0.00016059 | 8.6769e-06 | -18.507 | 1.2197e-71 |
| Avg_betweenness_centrality | 3.1095      | 1.0789     | 2.8821  | 0.0039851  |
| Avg_closeness_centrality   | -8.4426e-05 | 1.5012e-05 | -5.6241 | 2.0791e-08 |
| Avg_degree                 | -0.015776   | 0.0043026  | -3.6666 | 0.00025105 |
| Avg_eigenvalue_centrality  | -6.9958     | 0.44458    | -15.736 | 3.3485e-53 |
| Number_of_edges            | 2.0941e-05  | 4.3658e-06 | 4.7966  | 1.7113e-06 |

Number of observations: 2434, Error degrees of freedom: 2427

Root Mean Squared Error: 0.00349

R-squared: 0.46, Adjusted R-Squared 0.459

F-statistic vs. constant model: 345, p-value = 2.42e-320

ANOVA\_ANALYSIS =

|          | SumSq    | DF   | MeanSq     | F      | pValue      |
|----------|----------|------|------------|--------|-------------|
| Total    | 0.054816 | 2433 | 2.253e-05  |        |             |
| Model    | 0.025219 | 6    | 0.0042032  | 344.68 | 2.4165e-320 |
| Residual | 0.029596 | 2427 | 1.2195e-05 |        |             |

**Fig. 19.** Multilinear regression model, predicting the ride-sharing utilization using the dynamic network's properties

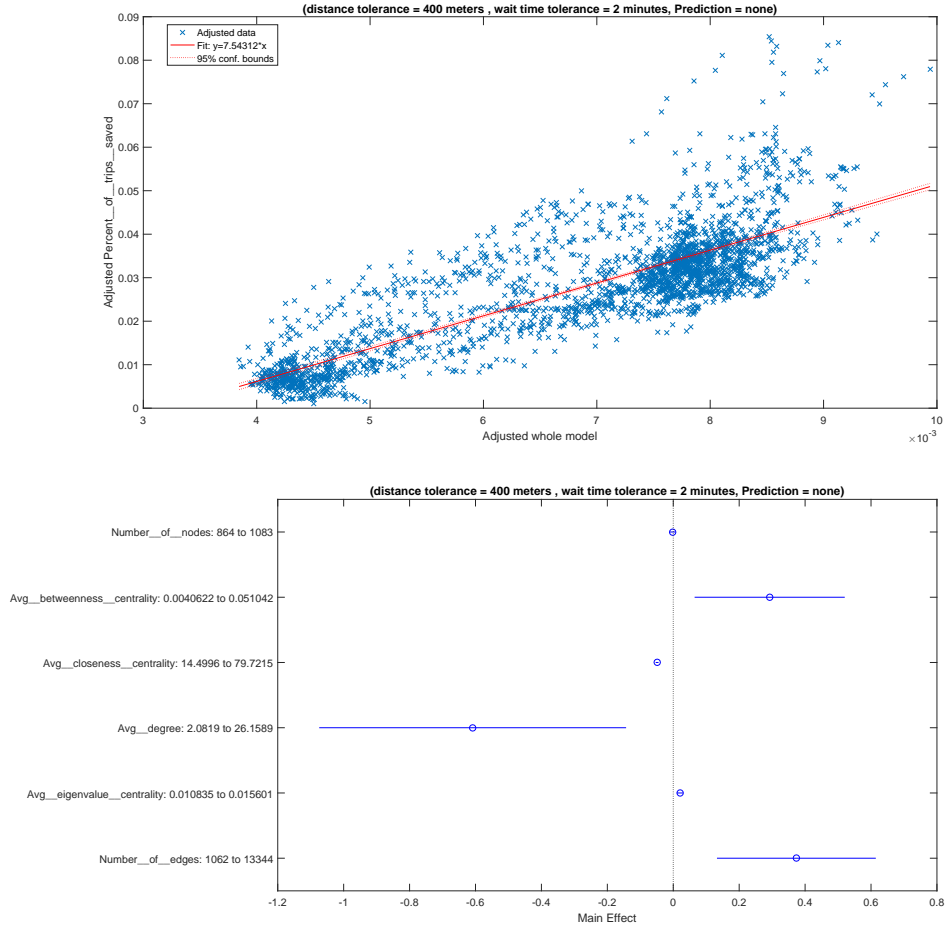

Estimated Coefficients:

|                            | Estimate    | SE         | tStat    | pValue     |
|----------------------------|-------------|------------|----------|------------|
| (Intercept)                | -0.024022   | 0.026666   | -0.90085 | 0.36776    |
| Number_of_nodes            | -8.6047e-06 | 1.9866e-05 | -0.43314 | 0.66495    |
| Avg_betweenness centrality | 6.227       | 2.4724     | 2.5187   | 0.011844   |
| Avg_closeness centrality   | -0.00075145 | 3.4186e-05 | -21.981  | 6.9988e-98 |
| Avg_degree                 | -0.025278   | 0.0098607  | -2.5635  | 0.010422   |
| Avg_eigenvalue centrality  | 4.257       | 1.0088     | 4.22     | 2.5325e-05 |
| Number_of_edges            | 3.0418e-05  | 1.0005e-05 | 3.0401   | 0.0023896  |

Number of observations: 2455, Error degrees of freedom: 2448  
Root Mean Squared Error: 0.008

R-squared: 0.663, Adjusted R-Squared 0.662  
F-statistic vs. constant model: 803, p-value = 0

ANOVA\_ANALYSIS =

|          | SumSq   | DF   | MeanSq     | F      | pValue |
|----------|---------|------|------------|--------|--------|
| Total    | 0.46544 | 2454 | 0.00018966 |        |        |
| Model    | 0.30858 | 6    | 0.05143    | 802.64 | 0      |
| Residual | 0.15686 | 2448 | 6.4075e-05 |        |        |

**Fig. 20.** Multilinear regression model, predicting the ride-sharing utilization using the dynamic network's properties

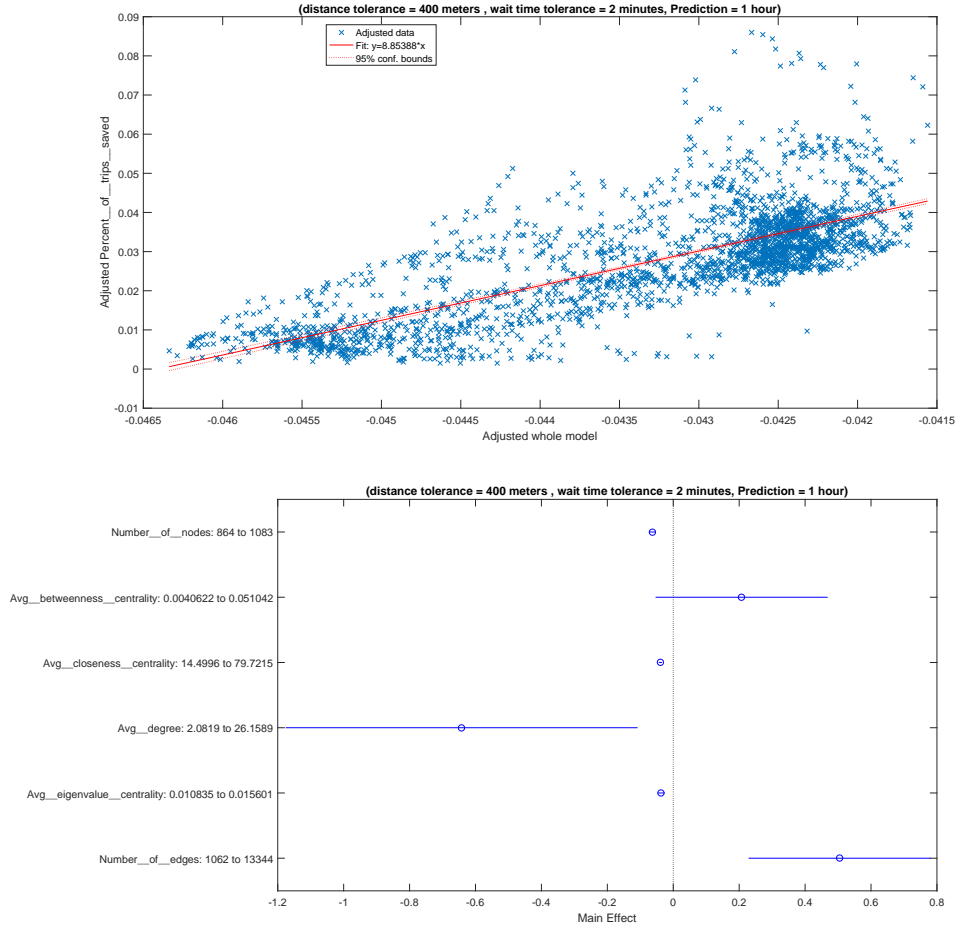

Estimated Coefficients:

|                            | Estimate    | SE         | tStat   | pValue     |
|----------------------------|-------------|------------|---------|------------|
| (Intercept)                | 0.41087     | 0.030574   | 13.439  | 8.9037e-40 |
| Number_of_nodes            | -0.00029226 | 2.2777e-05 | -12.831 | 1.599e-36  |
| Avg_betweenness centrality | 4.4153      | 2.8347     | 1.5576  | 0.11946    |
| Avg_closeness centrality   | -0.00059769 | 3.9196e-05 | -15.249 | 3.1646e-50 |
| Avg_degree                 | -0.026662   | 0.011306   | -2.3583 | 0.018437   |
| Avg_eigenvalue centrality  | -7.6743     | 1.1566     | -6.6352 | 3.9763e-11 |
| Number_of_edges            | 4.1122e-05  | 1.1472e-05 | 3.5847  | 0.00034407 |

Number of observations: 2455, Error degrees of freedom: 2448  
Root Mean Squared Error: 0.00918  
R-squared: 0.557, Adjusted R-Squared 0.556  
F-statistic vs. constant model: 513, p-value = 0

ANOVA\_ANALYSIS =

|          | SumSq   | DF   | MeanSq     | F      | pValue |
|----------|---------|------|------------|--------|--------|
| Total    | 0.46549 | 2454 | 0.00018969 |        |        |
| Model    | 0.25929 | 6    | 0.043215   | 513.05 | 0      |
| Residual | 0.2062  | 2448 | 8.4232e-05 |        |        |

Fig. 21. Multilinear regression model, predicting the ride-sharing utilization using the dynamic network's properties

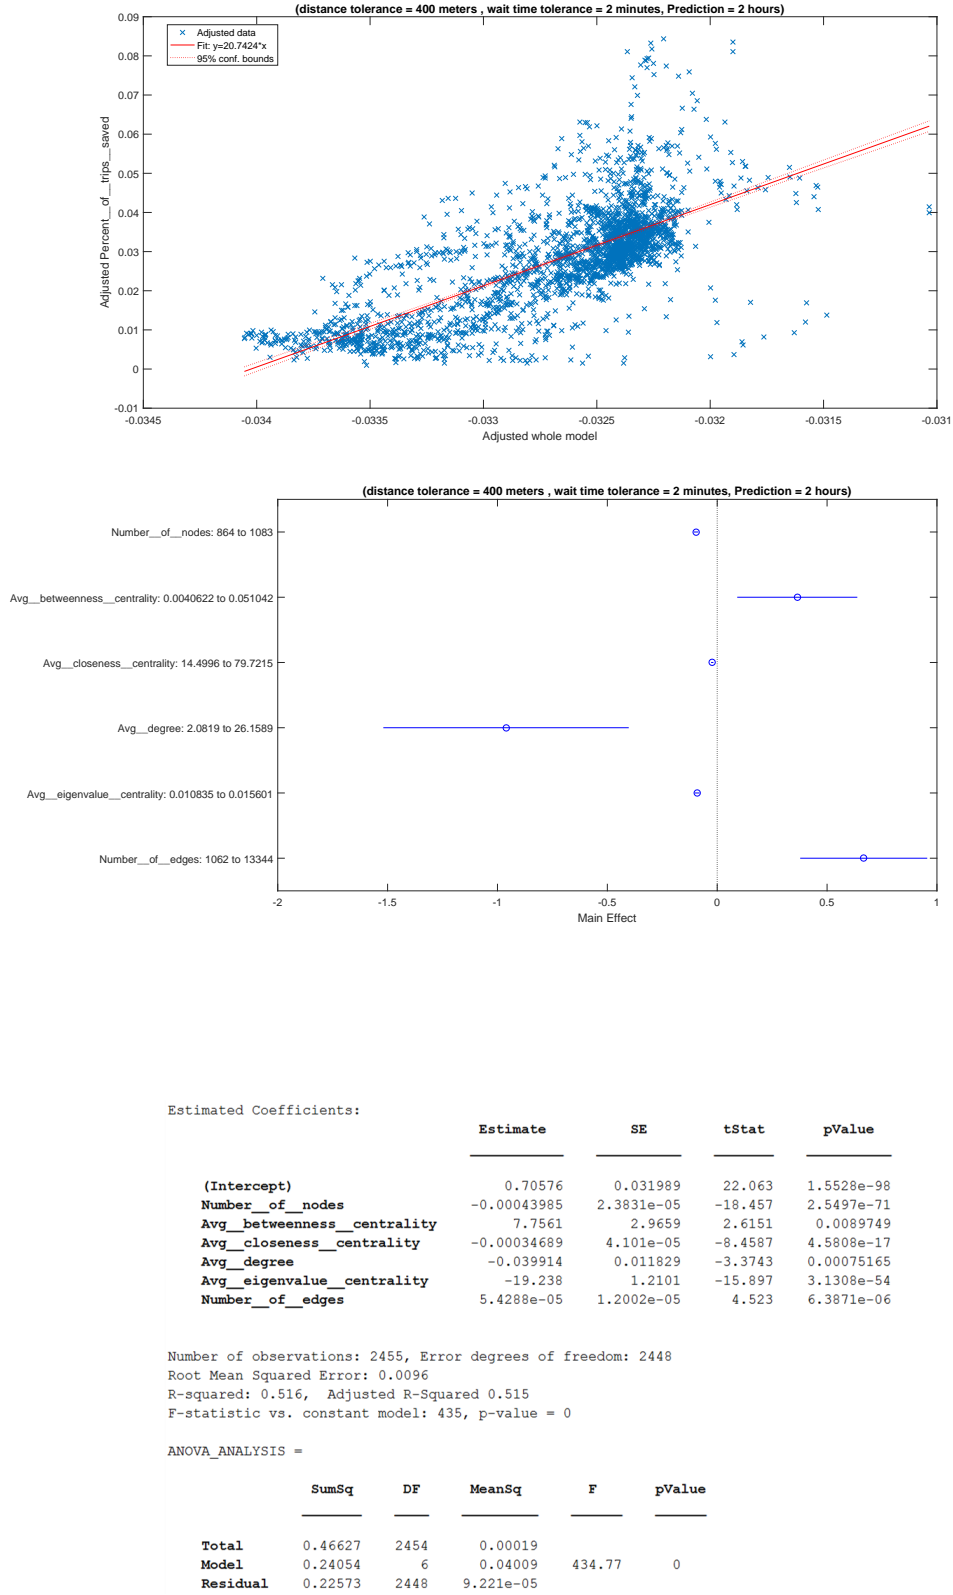

**Fig. 22.** Multilinear regression model, predicting the ride-sharing utilization using the dynamic network's properties

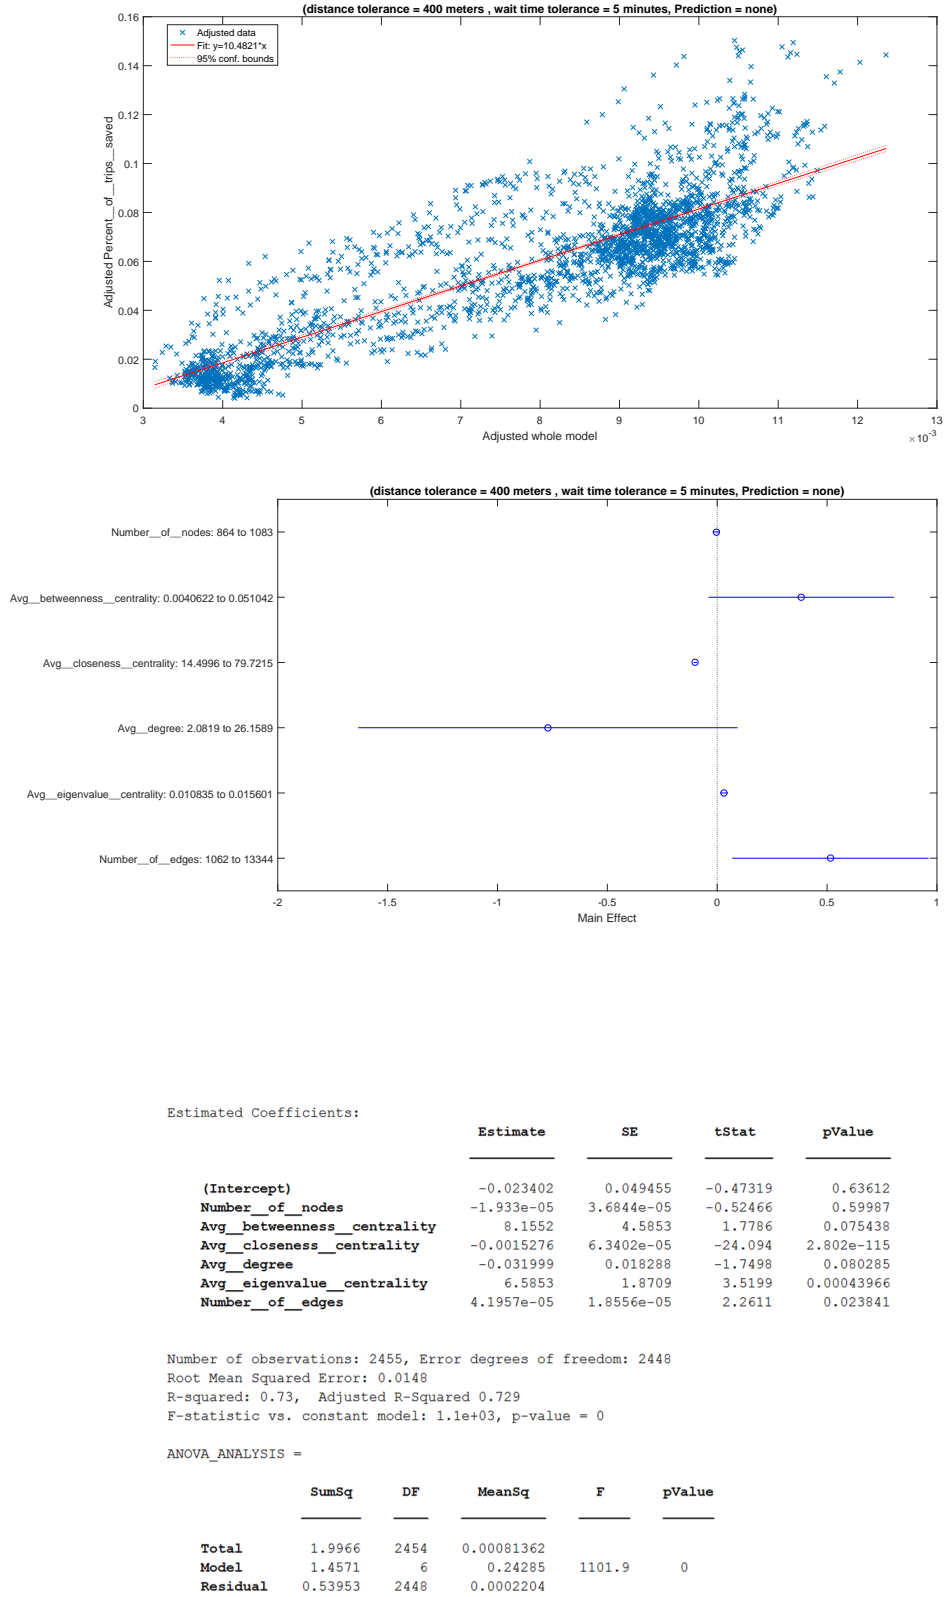

**Fig. 23.** Multilinear regression model, predicting the ride-sharing utilization using the dynamic network's properties



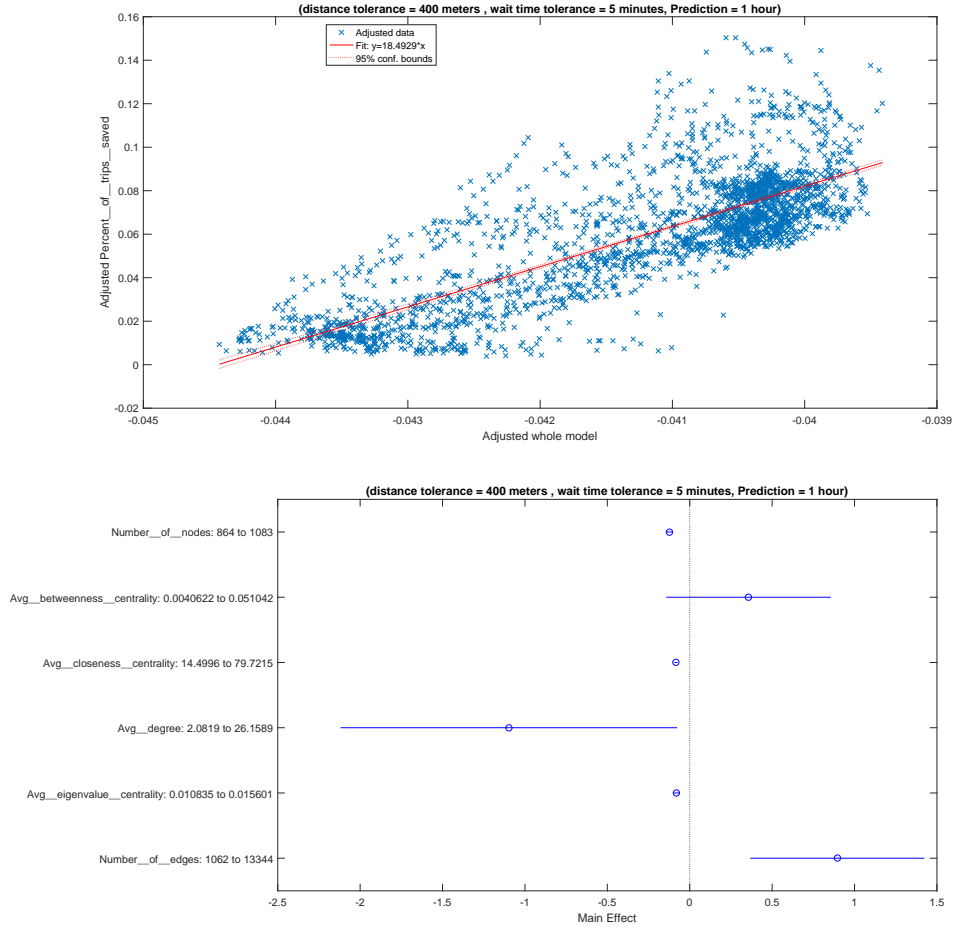

Estimated Coefficients:

|                            | Estimate    | SE         | tStat   | pValue     |
|----------------------------|-------------|------------|---------|------------|
| (Intercept)                | 0.82177     | 0.058462   | 14.056  | 3.2169e-43 |
| Number_of_nodes            | -0.00056557 | 4.3554e-05 | -12.985 | 2.4598e-37 |
| Avg_betweenness centrality | 7.5943      | 5.4204     | 1.401   | 0.16133    |
| Avg_closeness centrality   | -0.0012879  | 7.495e-05  | -17.184 | 1.4197e-62 |
| Avg_degree                 | -0.045583   | 0.021619   | -2.1085 | 0.035088   |
| Avg_eigenvalue centrality  | -16.862     | 2.2117     | -7.624  | 3.4958e-14 |
| Number_of_edges            | 7.2904e-05  | 2.1936e-05 | 3.3236  | 0.00090187 |

Number of observations: 2455, Error degrees of freedom: 2448  
Root Mean Squared Error: 0.0175  
R-squared: 0.624, Adjusted R-Squared 0.624  
F-statistic vs. constant model: 678, p-value = 0

ANOVA ANALYSIS =

|          | SumSq   | DF   | MeanSq     | F      | pValue |
|----------|---------|------|------------|--------|--------|
| Total    | 2.0075  | 2454 | 0.00081805 |        |        |
| Model    | 1.2535  | 6    | 0.20892    | 678.35 | 0      |
| Residual | 0.75396 | 2448 | 0.00030799 |        |        |

**Fig. 24.** Multilinear regression model, predicting the ride-sharing utilization using the dynamic network's properties

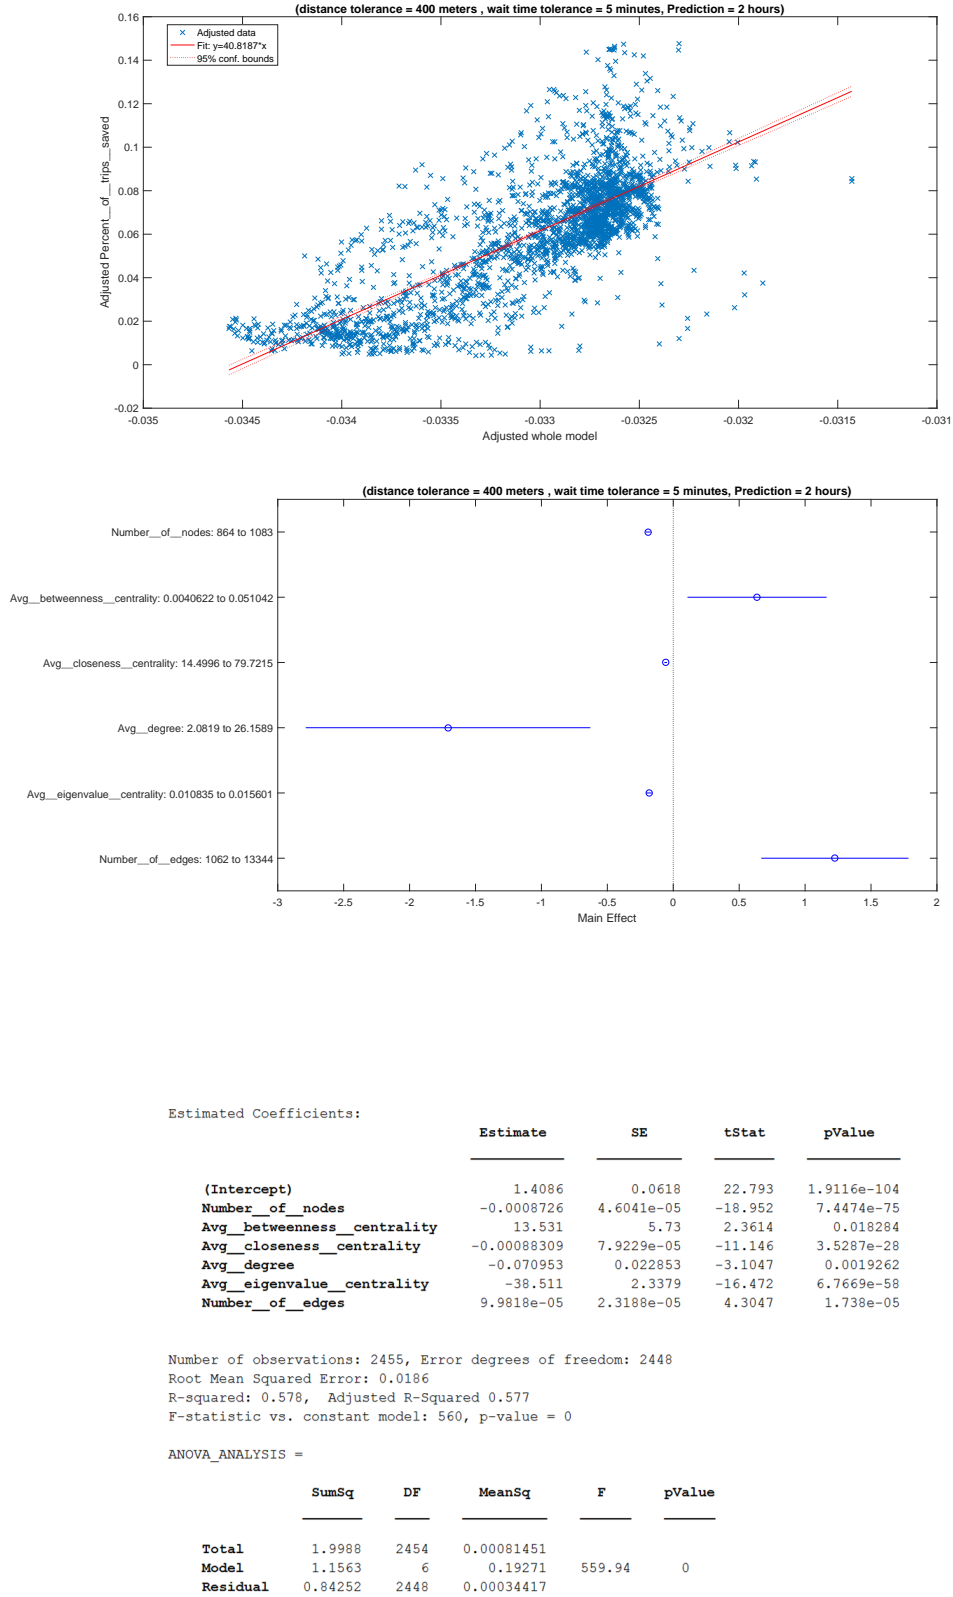

**Fig. 25.** Multilinear regression model, predicting the ride-sharing utilization using the dynamic network's properties

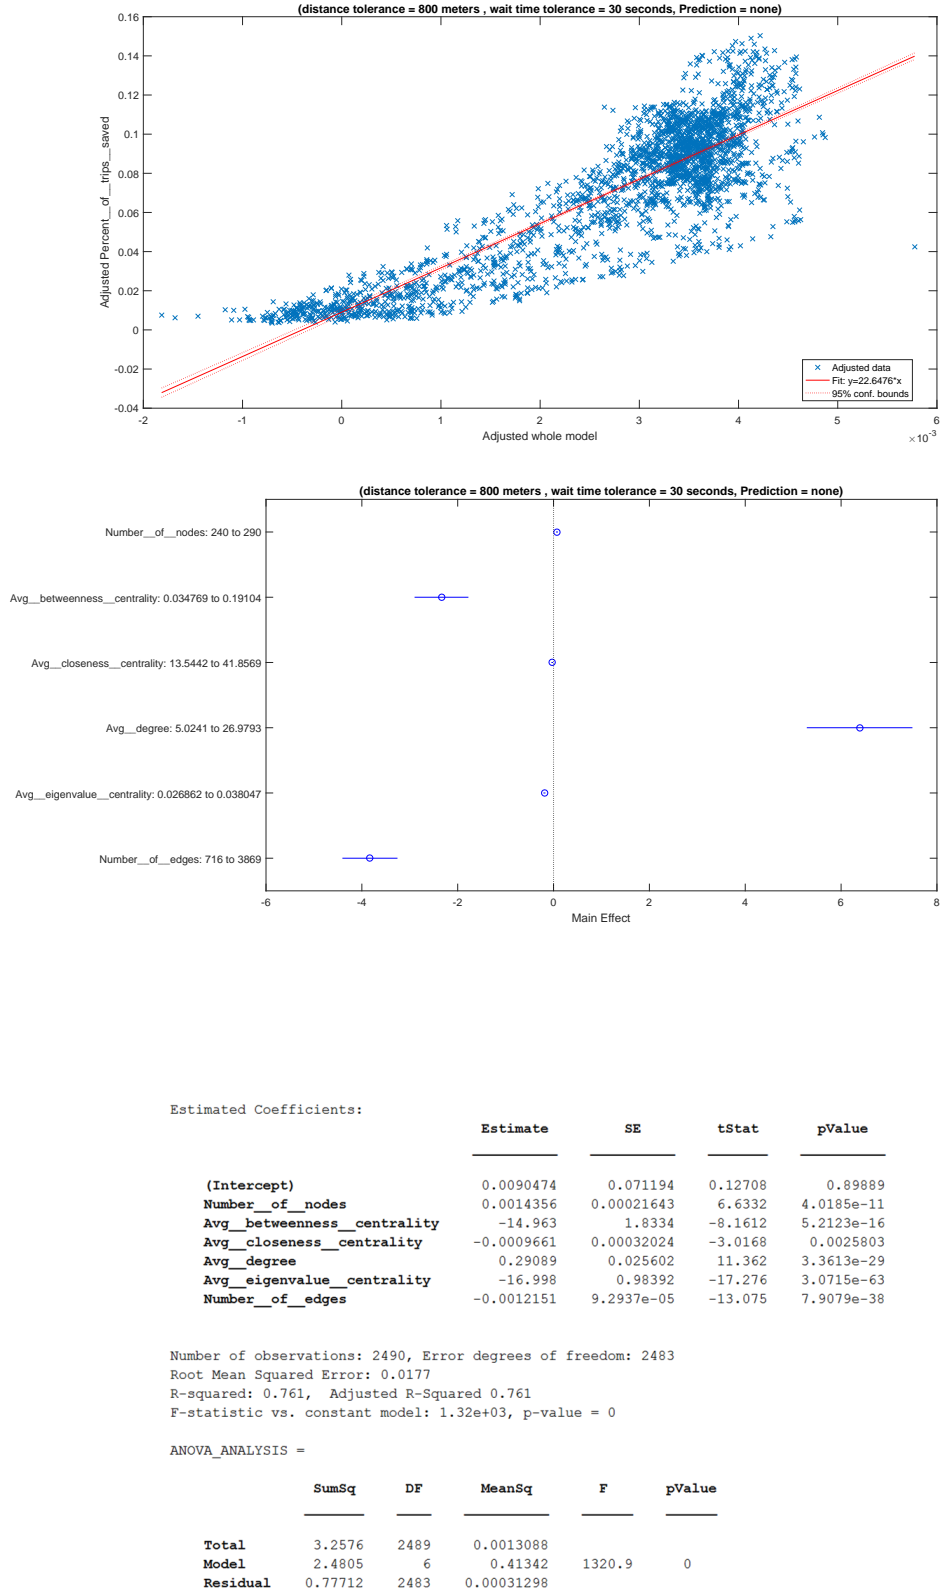

**Fig. 26.** Multilinear regression model, predicting the ride-sharing utilization using the dynamic network's properties

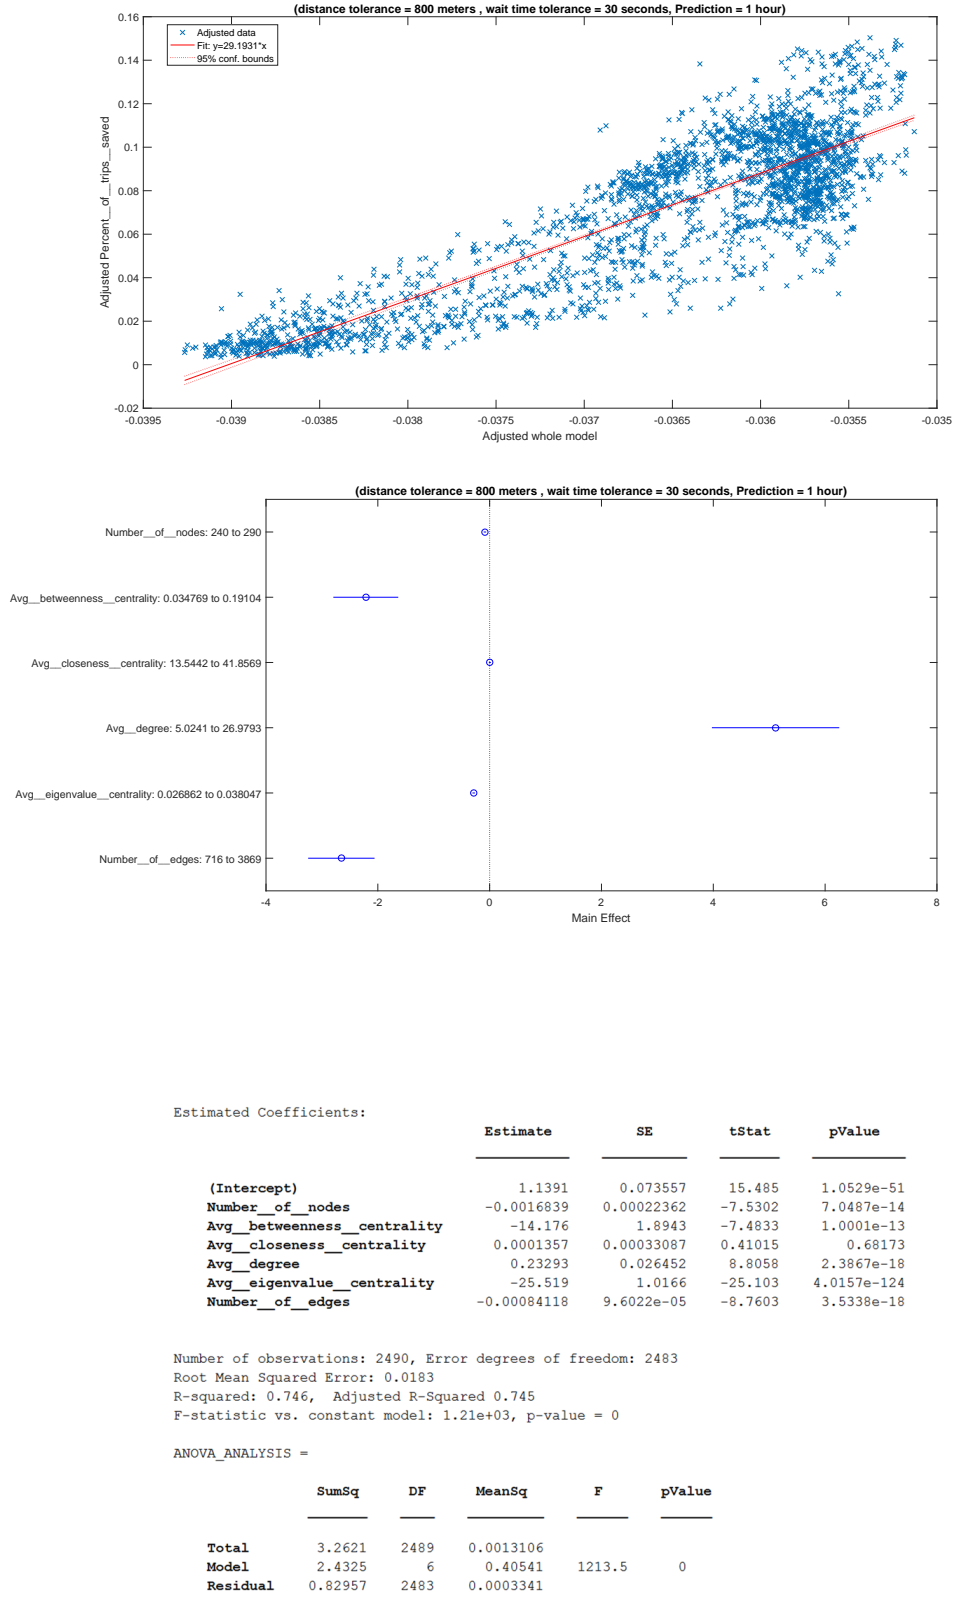

**Fig. 27.** Multilinear regression model, predicting the ride-sharing utilization using the dynamic network's properties

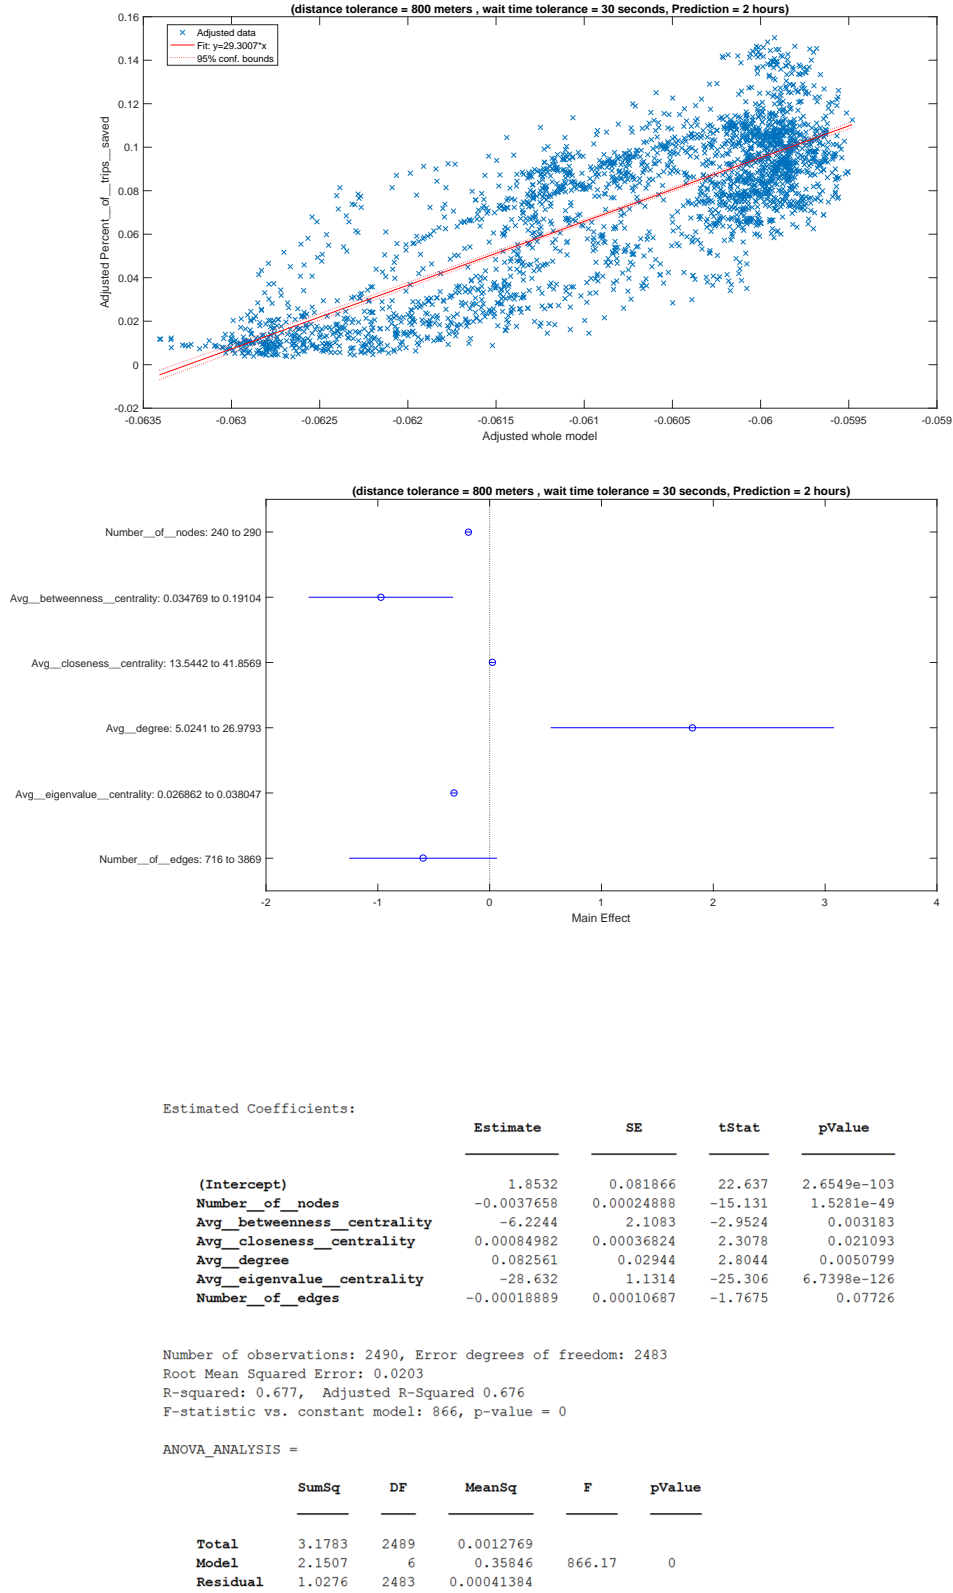

**Fig. 28.** Multilinear regression model, predicting the ride-sharing utilization using the dynamic network's properties

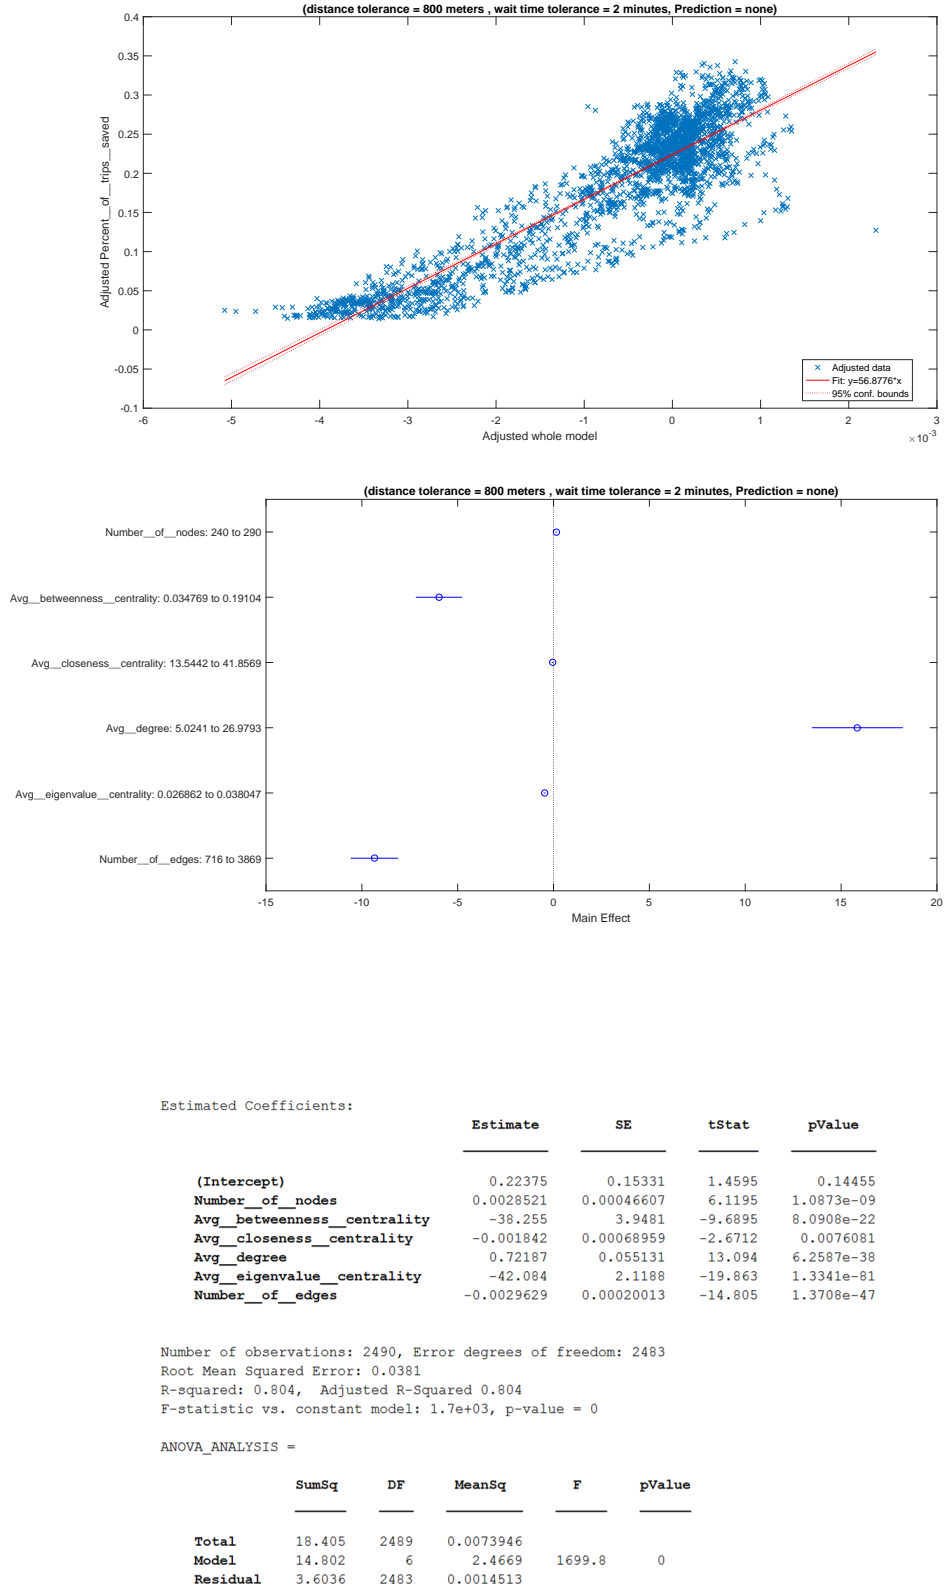

**Fig. 29.** Multilinear regression model, predicting the ride-sharing utilization using the dynamic network's properties

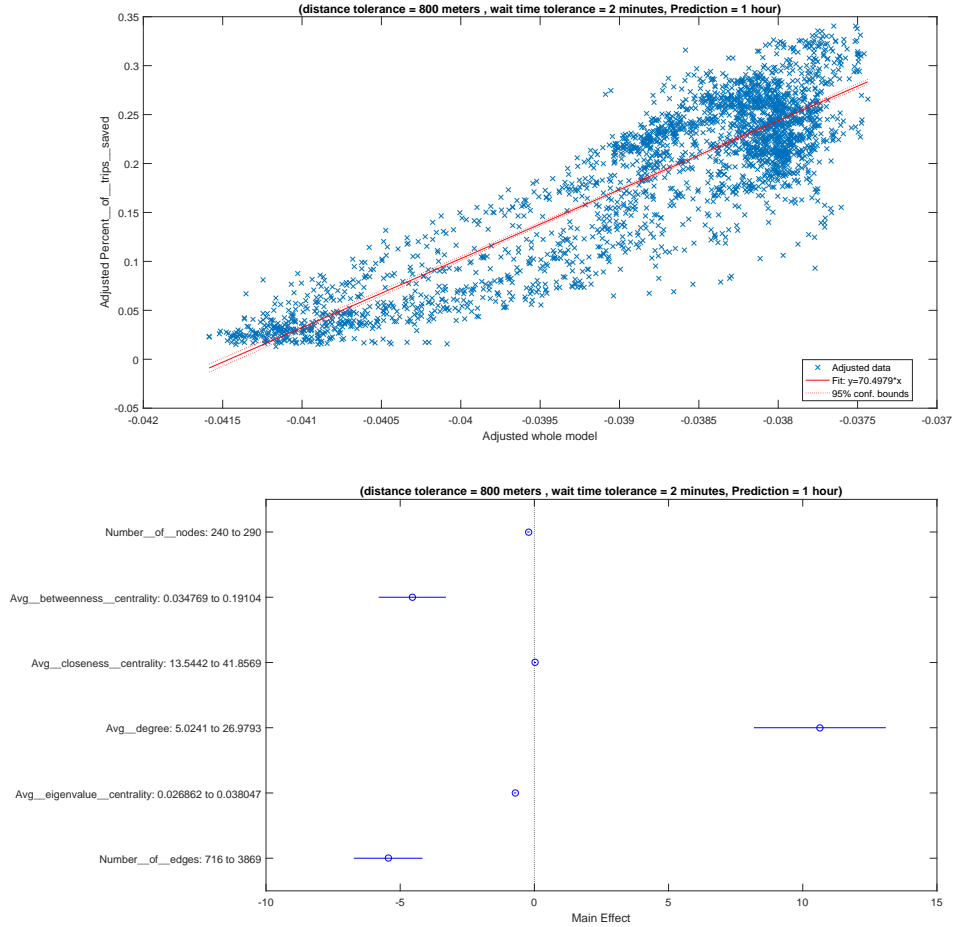

Estimated Coefficients:

|                            | Estimate   | SE         | tStat   | pValue      |
|----------------------------|------------|------------|---------|-------------|
| (Intercept)                | 2.9227     | 0.15873    | 18.413  | 4.496e-71   |
| Number_of_nodes            | -0.004423  | 0.00048255 | -9.1658 | 1.002e-19   |
| Avg_betweenness centrality | -29.097    | 4.0878     | -7.1181 | 1.4262e-12  |
| Avg_closeness centrality   | 0.00086988 | 0.00071399 | 1.2183  | 0.22321     |
| Avg_degree                 | 0.48447    | 0.057081   | 8.4874  | 3.5786e-17  |
| Avg_eigenvalue centrality  | -64.211    | 2.1937     | -29.271 | 4.6691e-162 |
| Number_of_edges            | -0.0017278 | 0.00020721 | -8.3384 | 1.2315e-16  |

Number of observations: 2490, Error degrees of freedom: 2483

Root Mean Squared Error: 0.0394

R-squared: 0.788, Adjusted R-Squared 0.787

F-statistic vs. constant model: 1.54e+03, p-value = 0

ANOVA\_ANALYSIS =

|          | SumSq  | DF   | MeanSq    | F      | pValue |
|----------|--------|------|-----------|--------|--------|
| Total    | 18.221 | 2489 | 0.0073206 |        |        |
| Model    | 14.358 | 6    | 2.393     | 1538.1 | 0      |
| Residual | 3.863  | 2483 | 0.0015558 |        |        |

**Fig. 30.** Multilinear regression model, predicting the ride-sharing utilization using the dynamic network's properties

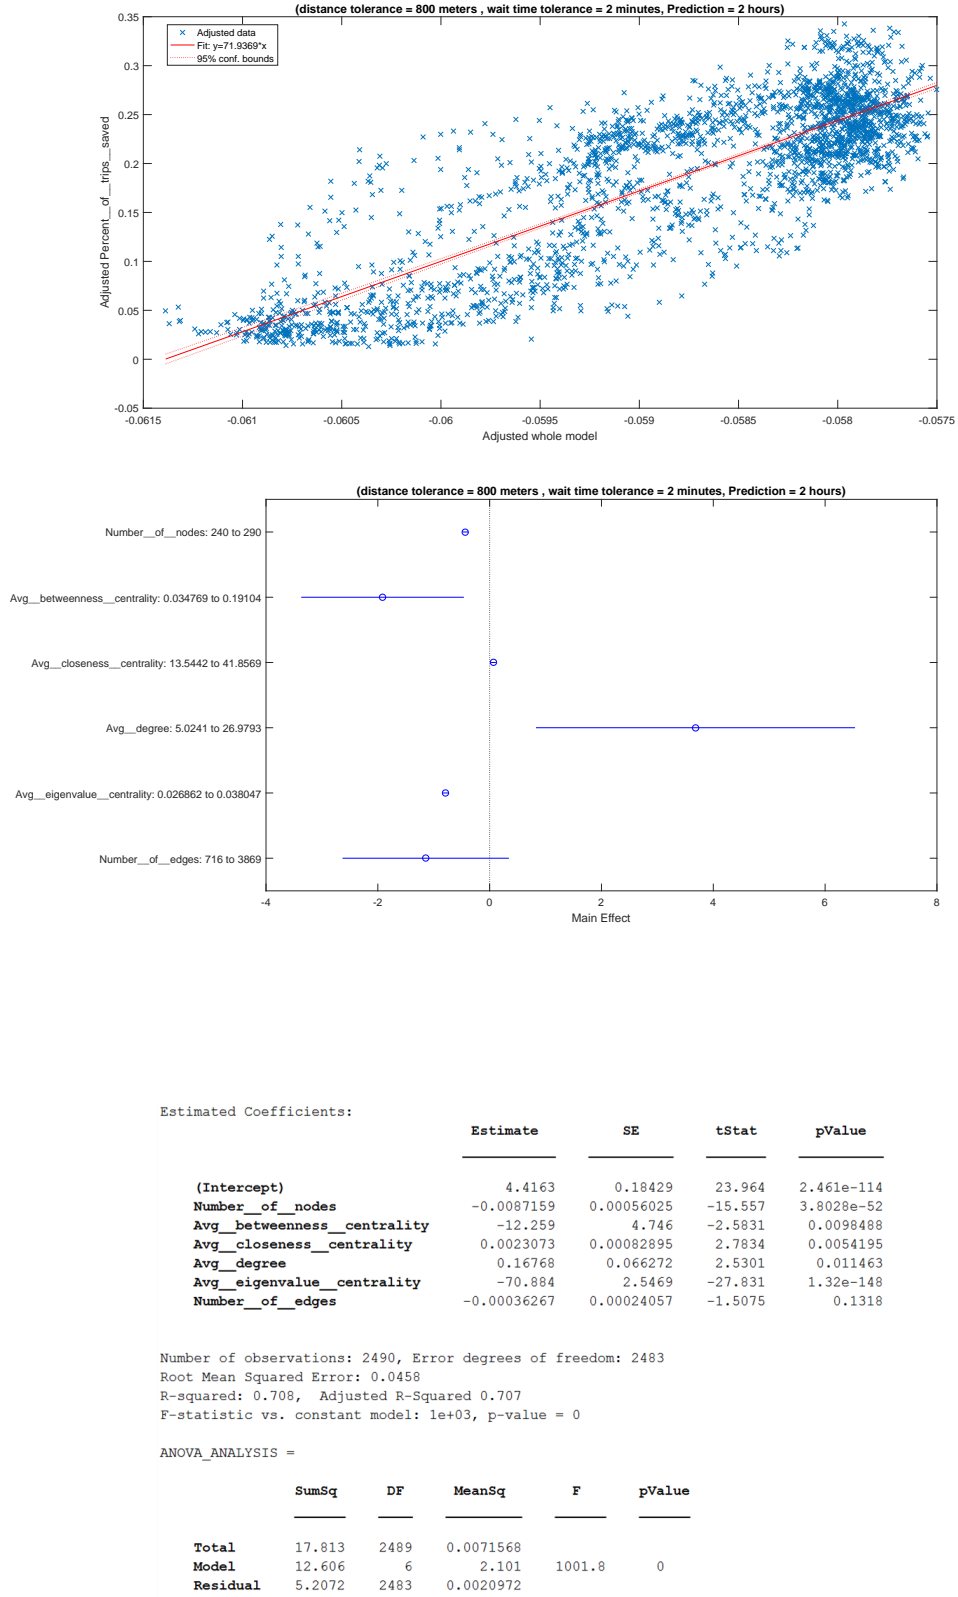

**Fig. 31.** Multilinear regression model, predicting the ride-sharing utilization using the dynamic network's properties



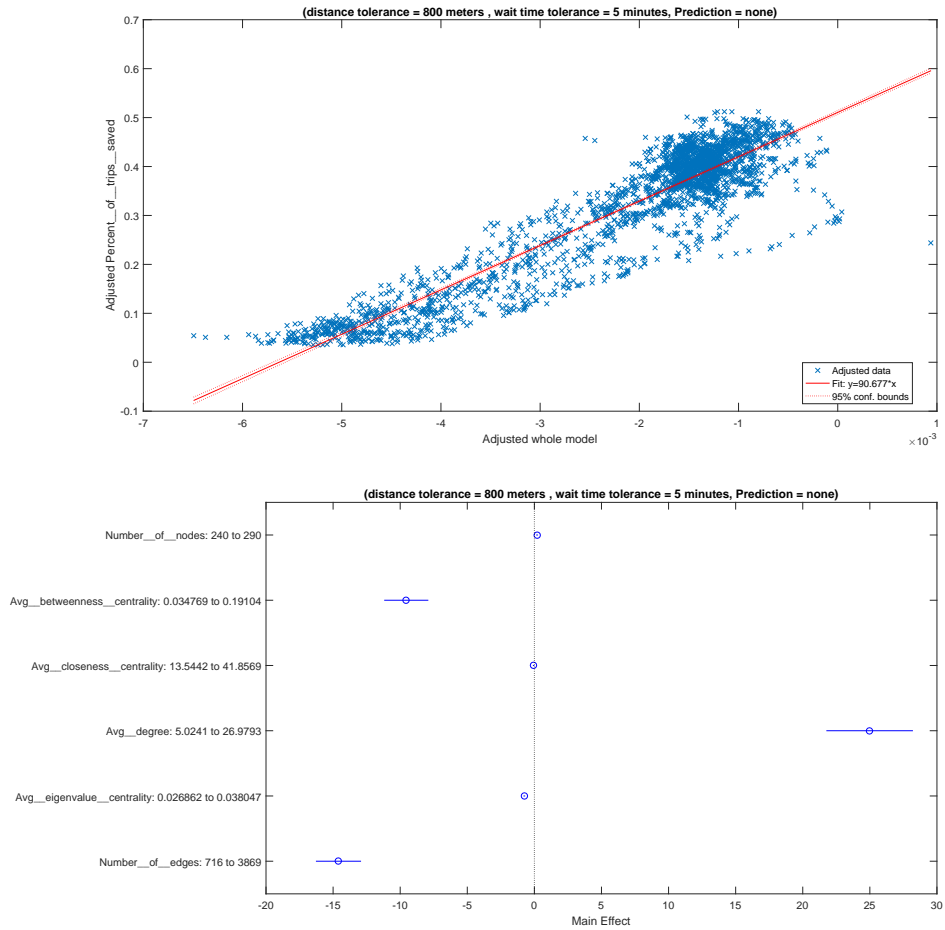

Estimated Coefficients:

|                            | Estimate   | SE         | tStat   | pValue      |
|----------------------------|------------|------------|---------|-------------|
| (Intercept)                | 0.5106     | 0.20836    | 2.4506  | 0.01433     |
| Number_of_nodes            | 0.0040236  | 0.00063342 | 6.3521  | 2.5174e-10  |
| Avg_betweenness_centrality | -61.095    | 5.3658     | -11.386 | 2.5857e-29  |
| Avg_closeness_centrality   | -0.0020481 | 0.00093721 | -2.1853 | 0.028962    |
| Avg_degree                 | 1.138      | 0.074928   | 15.188  | 6.8953e-50  |
| Avg_eigenvalue_centrality  | -66.996    | 2.8796     | -23.266 | 1.7562e-108 |
| Number_of_edges            | -0.0046299 | 0.00027199 | -17.022 | 1.5195e-61  |

Number of observations: 2490, Error degrees of freedom: 2483  
Root Mean Squared Error: 0.0518  
R-squared: 0.848, Adjusted R-Squared 0.848  
F-statistic vs. constant model: 2.31e+03, p-value = 0

ANOVA\_ANALYSIS =

|          | SumSq  | DF   | MeanSq    | F      | pValue |
|----------|--------|------|-----------|--------|--------|
| Total    | 43.806 | 2489 | 0.0176    |        |        |
| Model    | 37.15  | 6    | 6.1917    | 2309.7 | 0      |
| Residual | 6.6562 | 2483 | 0.0026807 |        |        |

**Fig. 32.** Multilinear regression model, predicting the ride-sharing utilization using the dynamic network's properties

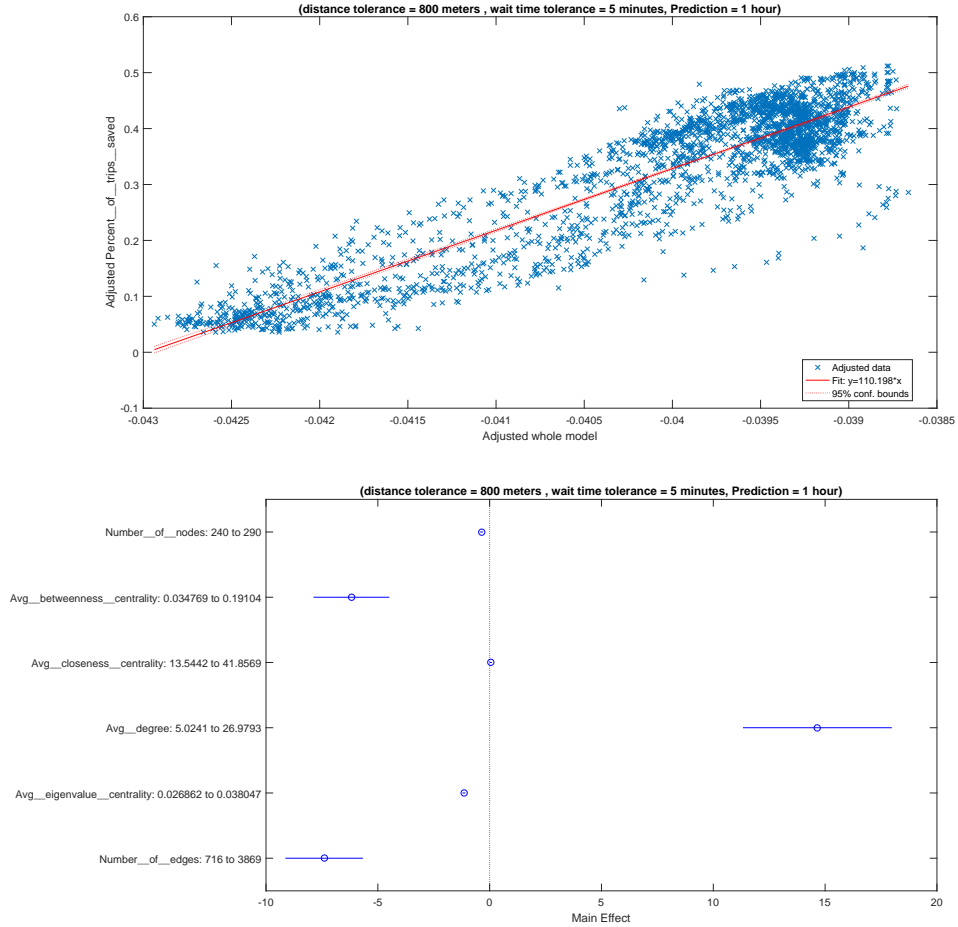

Estimated Coefficients:

|                            | Estimate   | SE         | tStat   | pValue      |
|----------------------------|------------|------------|---------|-------------|
| (Intercept)                | 4.7363     | 0.21495    | 22.035  | 1.9946e-98  |
| Number_of_nodes            | -0.0072379 | 0.00065345 | -11.076 | 7.2563e-28  |
| Avg_betweenness centrality | -39.555    | 5.5355     | -7.1457 | 1.1717e-12  |
| Avg_closeness centrality   | 0.0017503  | 0.00096685 | 1.8103  | 0.070375    |
| Avg_degree                 | 0.66746    | 0.077297   | 8.635   | 1.032e-17   |
| Avg_eigenvalue centrality  | -102.85    | 2.9706     | -34.623 | 1.1327e-214 |
| Number_of_edges            | -0.002347  | 0.00028059 | -8.3642 | 9.9509e-17  |

Number of observations: 2490, Error degrees of freedom: 2483  
Root Mean Squared Error: 0.0534  
R-squared: 0.836, Adjusted R-Squared 0.835  
F-statistic vs. constant model: 2.1e+03, p-value = 0

ANOVA\_ANALYSIS =

|          | SumSq  | DF   | MeanSq    | F      | pValue |
|----------|--------|------|-----------|--------|--------|
| Total    | 43.093 | 2489 | 0.017313  |        |        |
| Model    | 36.009 | 6    | 6.0015    | 2103.6 | 0      |
| Residual | 7.0838 | 2483 | 0.0028529 |        |        |

**Fig. 33.** Multilinear regression model, predicting the ride-sharing utilization using the dynamic network's properties

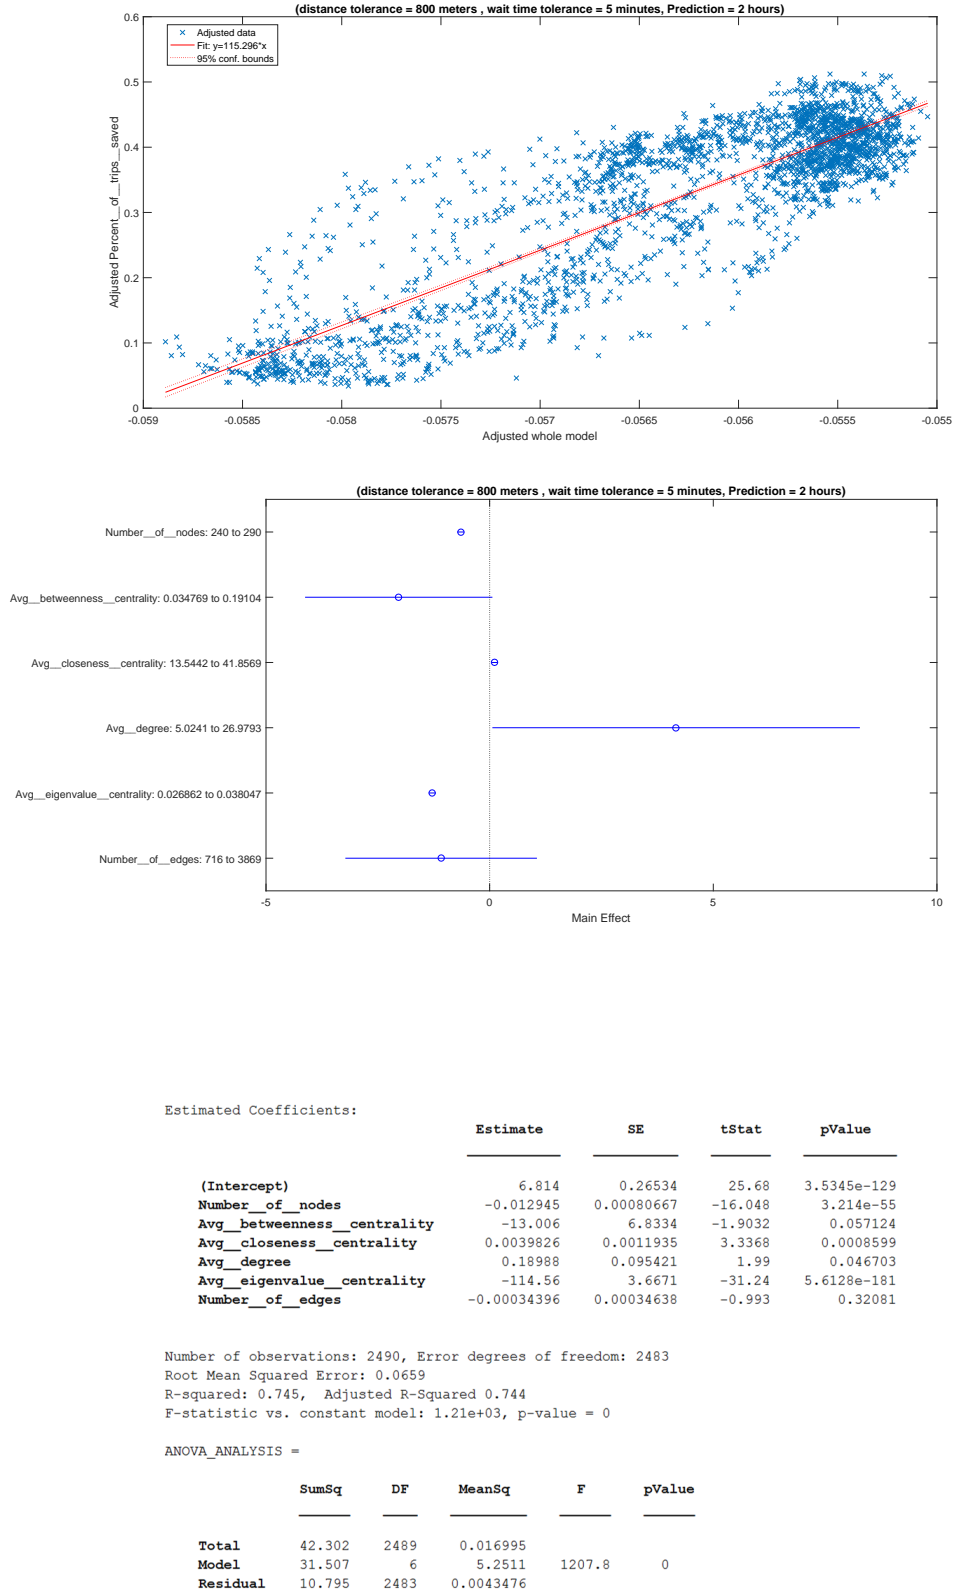

**Fig. 34.** Multilinear regression model, predicting the ride-sharing utilization using the dynamic network's properties

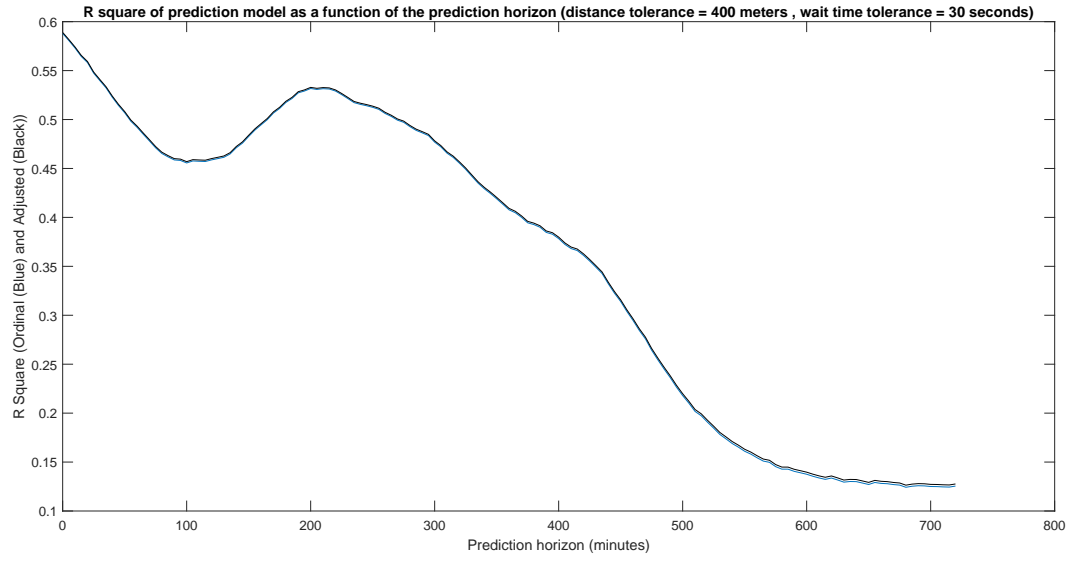

**Fig. 35.** The accuracy of the multilinear regression model, as measured by its  $R^2$ , as a function of the prediction horizon 1.

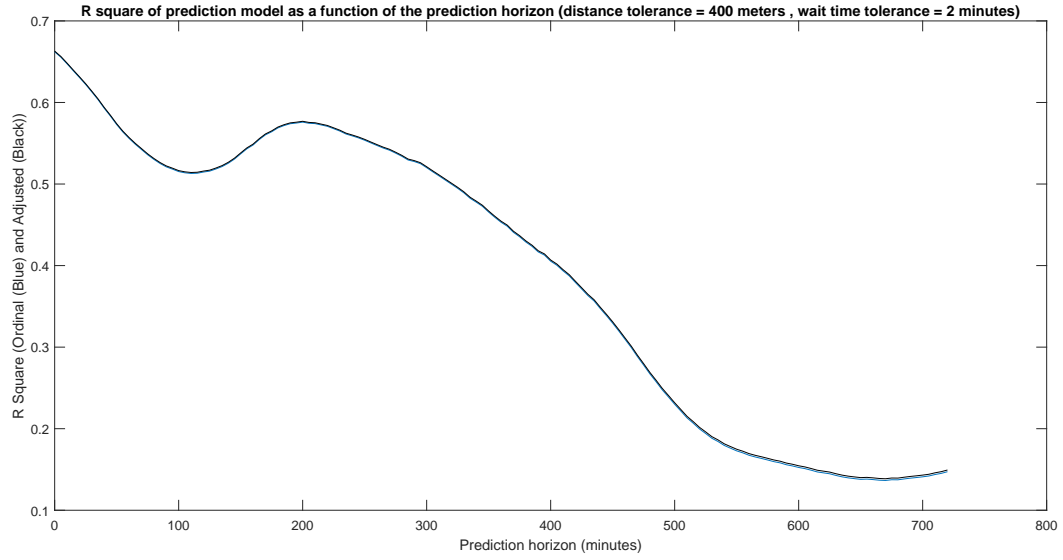

**Fig. 36.** The accuracy of the multilinear regression model, as measured by its  $R^2$ , as a function of the prediction horizon 2.

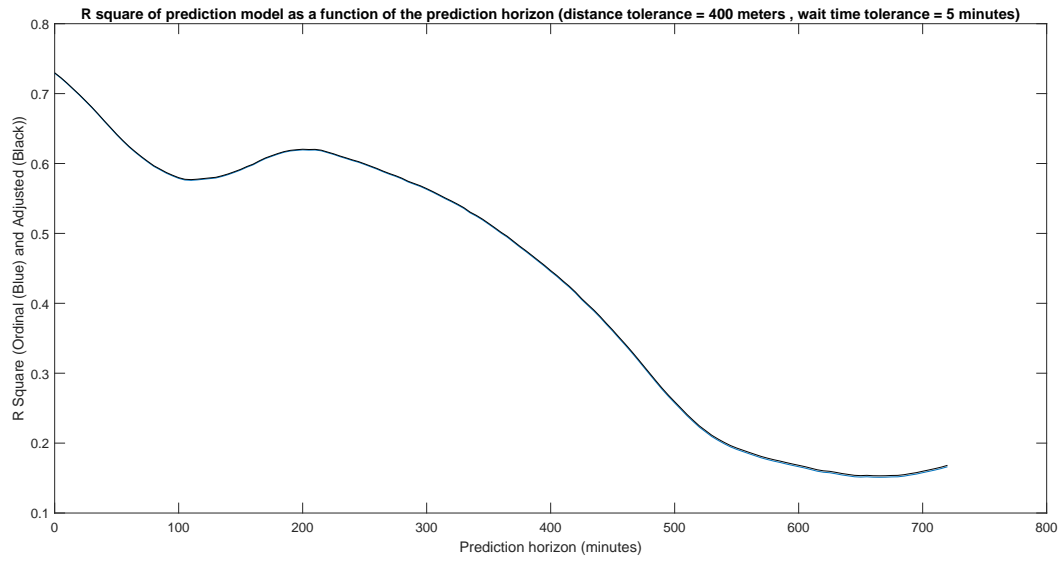

**Fig. 37.** The accuracy of the multilinear regression model, as measured by its  $R^2$ , as a function of the prediction horizon 3.

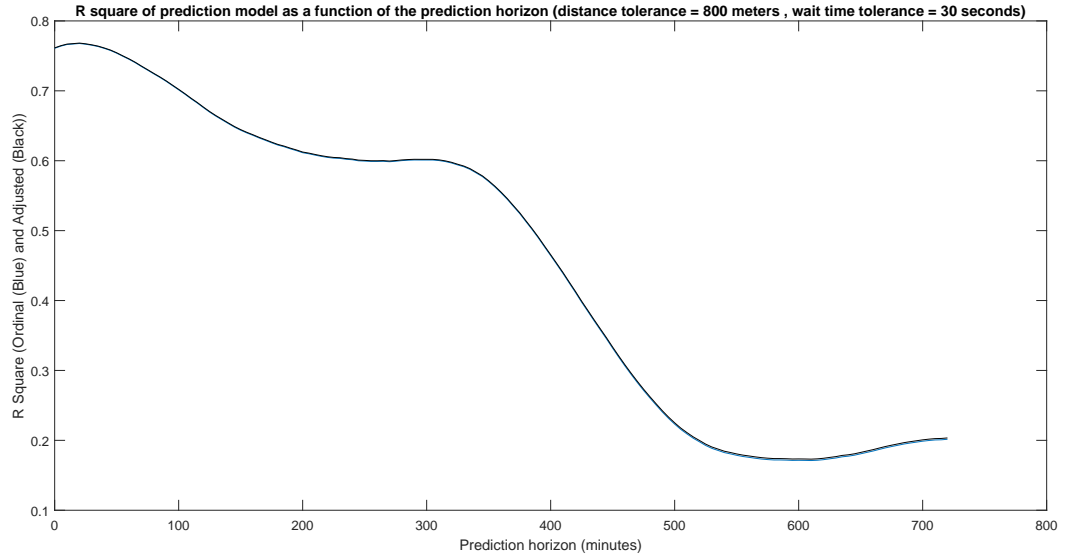

**Fig. 38.** The accuracy of the multilinear regression model, as measured by its  $R^2$ , as a function of the prediction horizon 4.

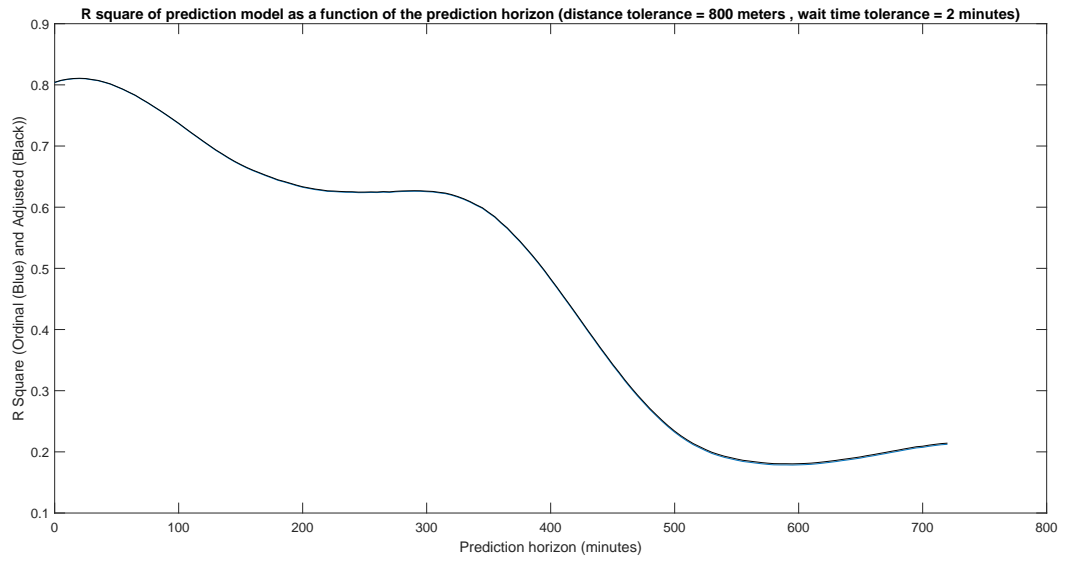

**Fig. 39.** The accuracy of the multilinear regression model, as measured by its  $R^2$ , as a function of the prediction horizon 5.

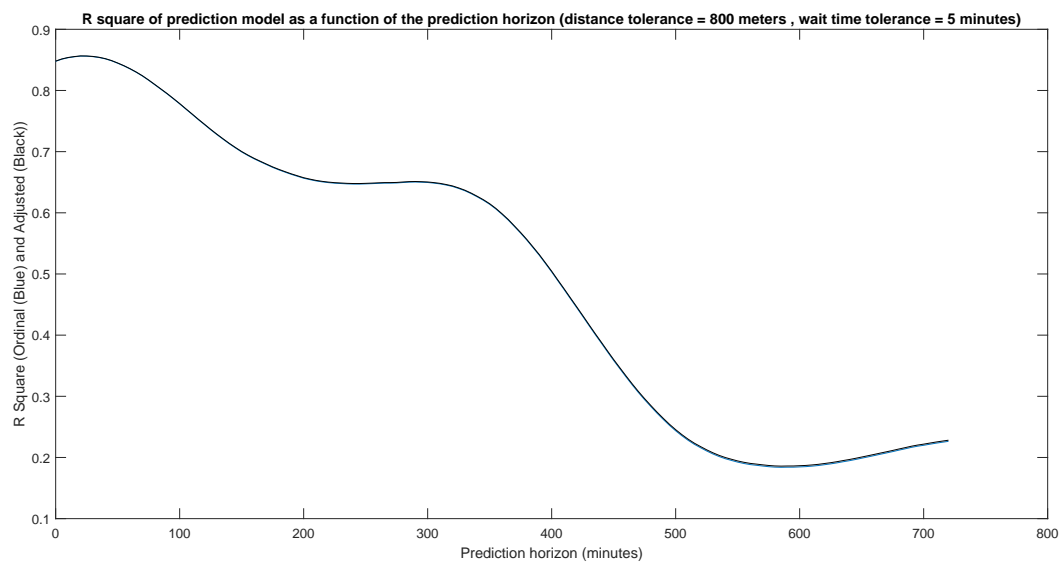

**Fig. 40.** The accuracy of the multilinear regression model, as measured by its  $R^2$ , as a function of the prediction horizon 6.

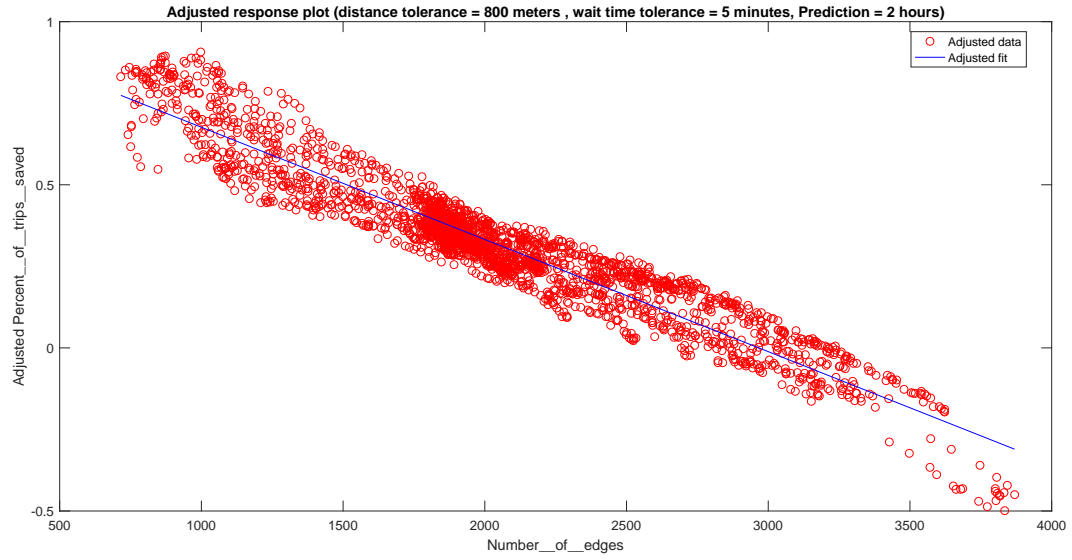

**Fig. 41.** The adjusted response plot for the number of edges of the dynamic network, created for distance tolerance = 800 meters , wait time tolerance = 5 minutes, prediction horizon = 2 hours.



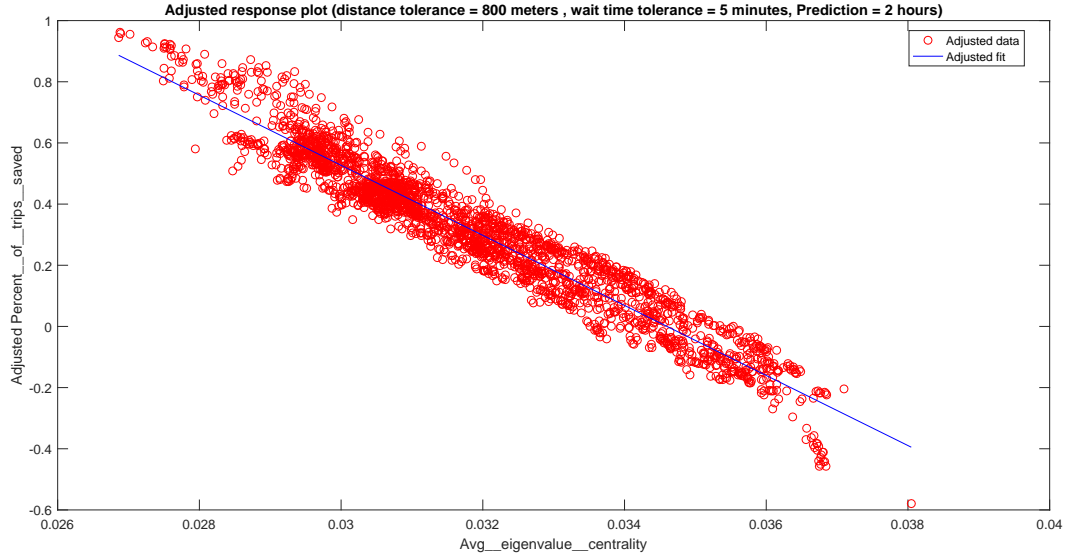

**Fig. 42.** The adjusted response plot for the average eigenvalue centrality of the dynamic network, created for distance tolerance = 800 meters , wait time tolerance = 5 minutes, prediction horizon = 2 hours.

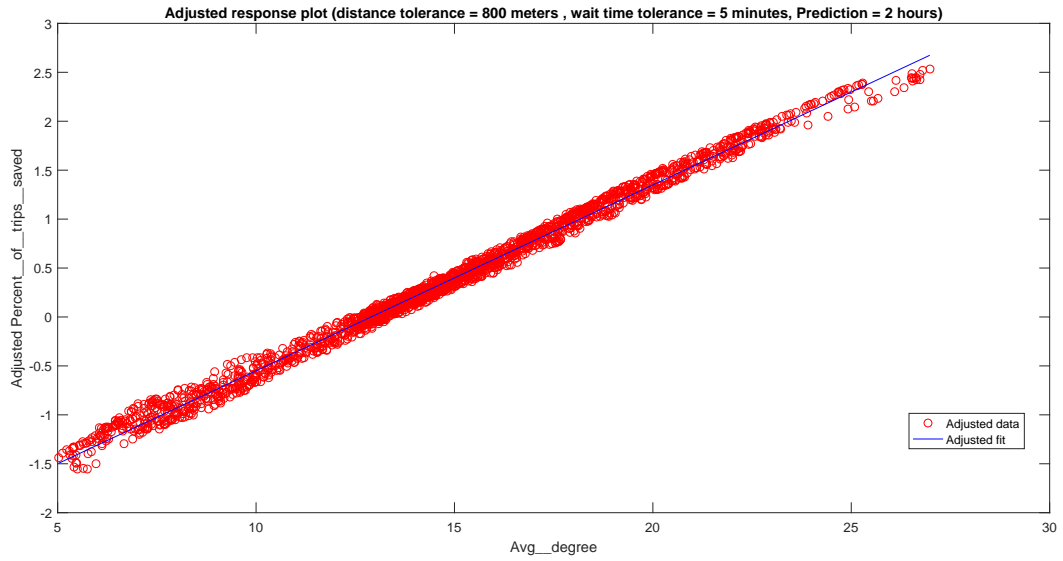

**Fig. 43.** The adjusted response plot for the average degree of the dynamic network, created for distance tolerance = 800 meters , wait time tolerance = 5 minutes, prediction horizon = 2 hours.

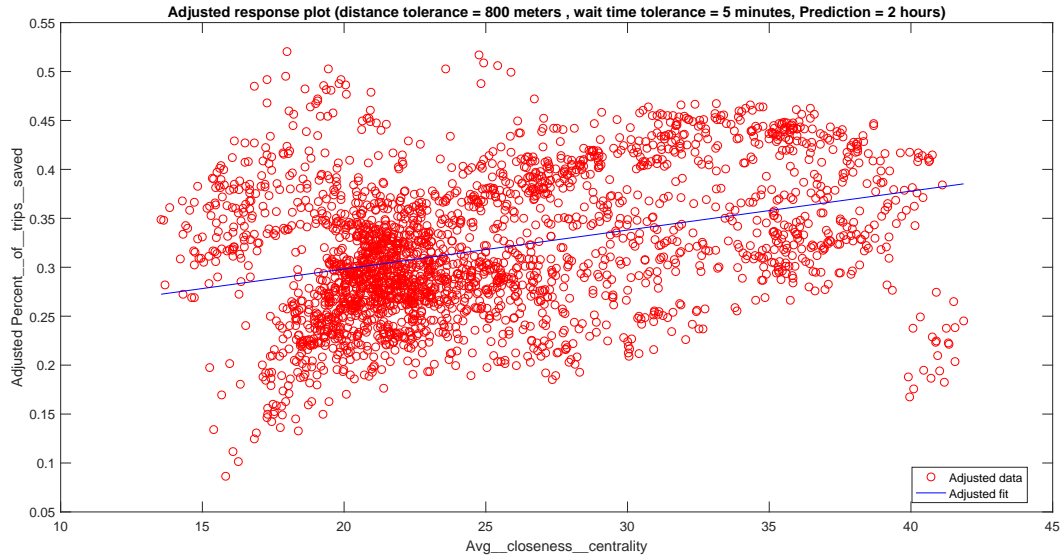

**Fig. 44.** The adjusted response plot for the average closeness centrality of the dynamic network, created for distance tolerance = 800 meters , wait time tolerance = 5 minutes, prediction horizon = 2 hours.

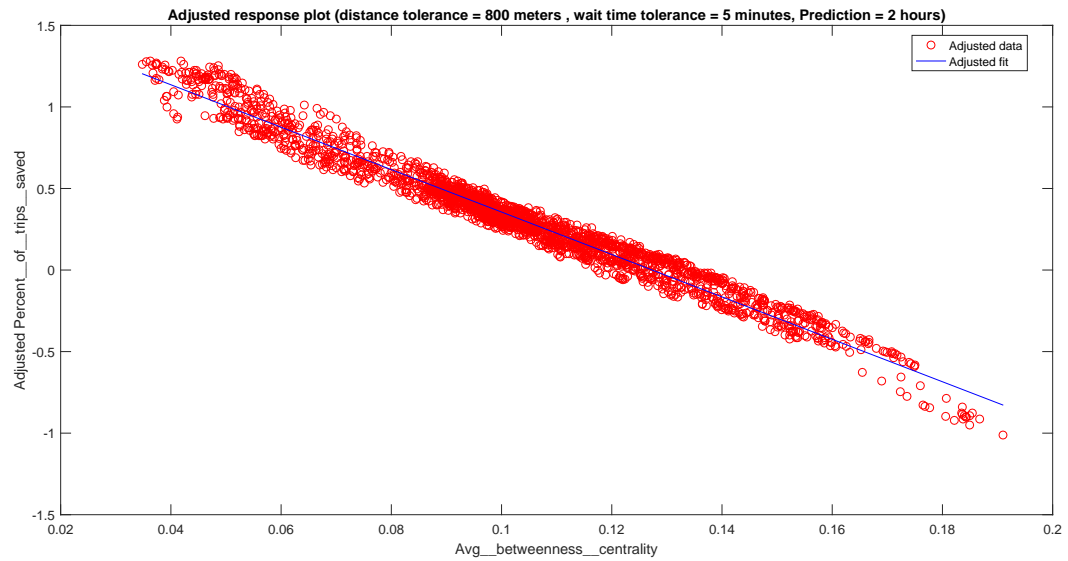

**Fig. 45.** The adjusted response plot for the average betweenness centrality of the dynamic network, created for distance tolerance = 800 meters , wait time tolerance = 5 minutes, prediction horizon = 2 hours.

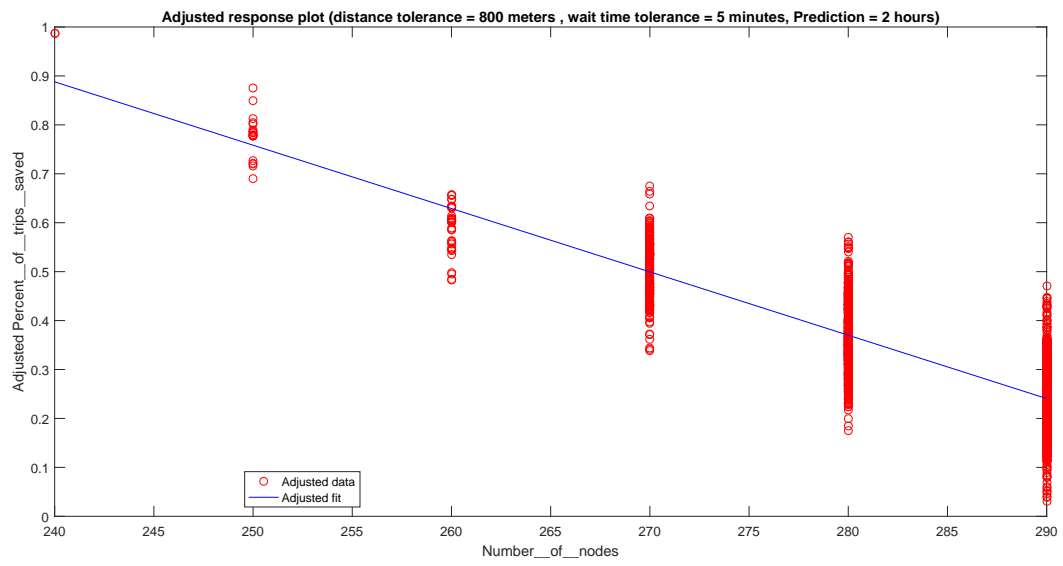

**Fig. 46.** The adjusted response plot for the number of nodes of the dynamic network, created for distance tolerance = 800 meters , wait time tolerance = 5 minutes, prediction horizon = 2 hours.

## **Appendix B: Data Availability Statement**

The taxi data used to support the findings of this study, encompassing a dataset of over 14 Million individual taxi trips taken in New York City, is accessible at the NYC Taxi repository [19].
